# Supplementary material
Source: HighWire-hosted journal article supplement (doi:10.1101/rna.040030.113)
Supplement: SuppMaterial.docx [file SuppMaterial.docx]

**The central role of protein S12 in organizing the structure of**

**the decoding site of the ribosome**

Hasan Demirci1, Leyi Wang2, Frank V. Murphy IV3, Eileen L. Murphy1, Jennifer F. Carr1, Scott C. Blanchard2, Gerwald Jogl1, Albert E. Dahlberg1 and Steven T. Gregory1 *

**Affiliations:**

1Department of Molecular Biology, Cell Biology and Biochemistry, Brown University, Providence, RI 02912 USA

2Department of Physiology and Biophysics, Weill Cornell Medical College of Cornell University, New York, NY 10021 USA

3NE-CAT/Cornell University, Argonne, IL 60439

*Correspondence to: steven_gregory@brown.edu

**Supplementary Figures And Table**


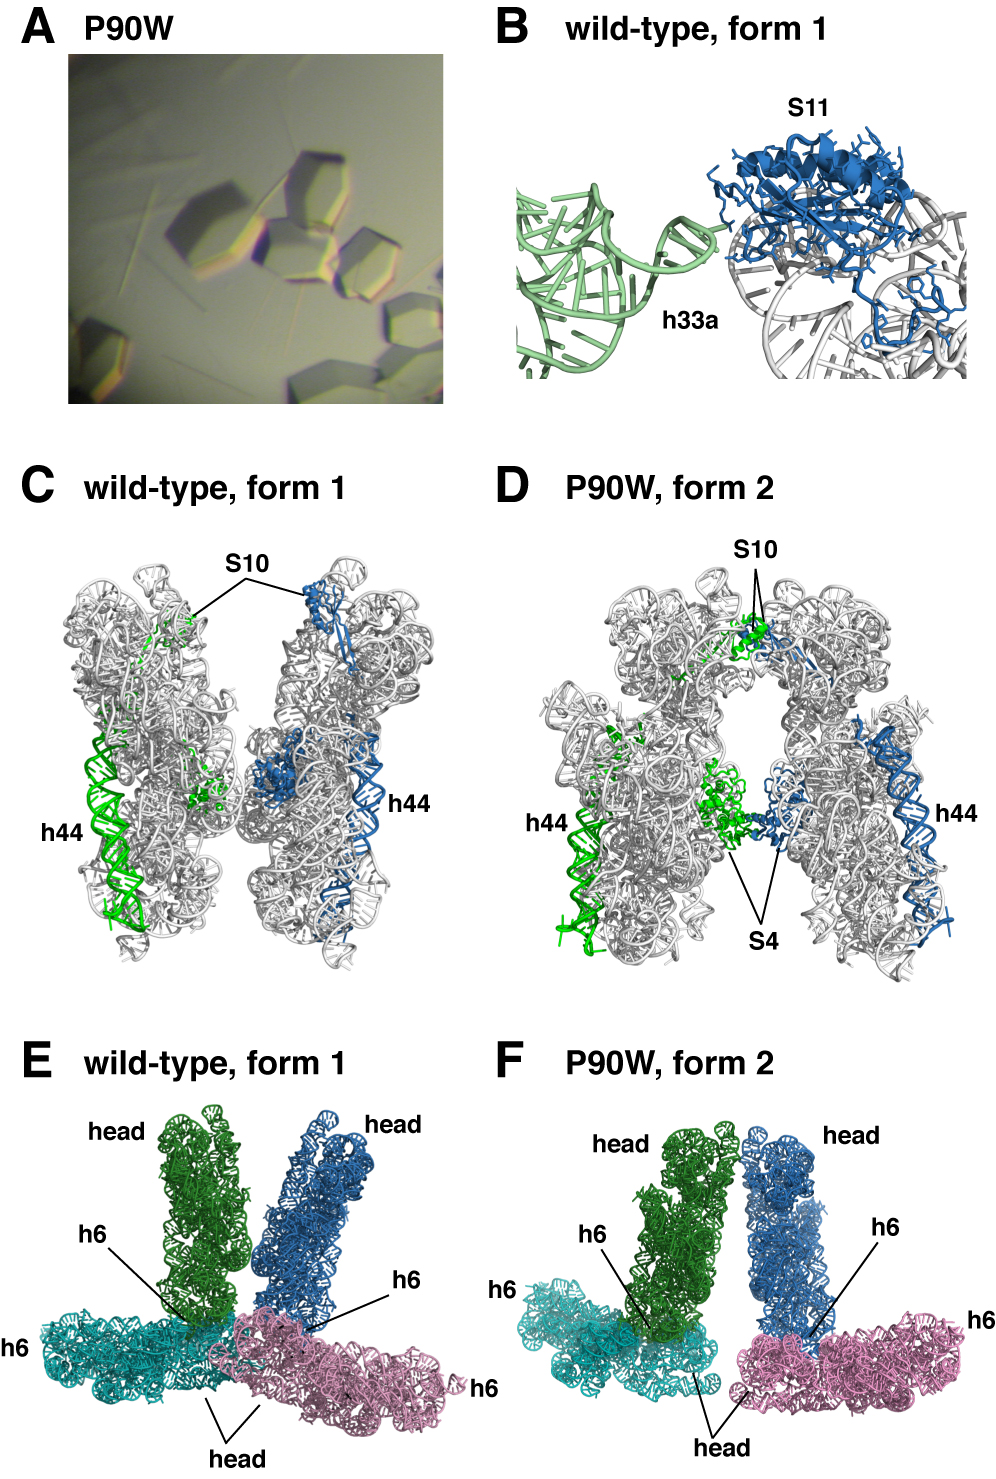


**FIGURE S1. SmD mutations induce the formation of a new 30S subunit crystal form.** (*A*) Crystals of the P90W SmD mutant in a mixture of both forms. Long needles are in form 1 (space group P41212, cell dimensions ~403 Å x 403 Å x 176 Å) and hexagonal crystals (space group P41212, cell dimensions ~400 Å x 400 Å x 215 Å) are in form 2. (*B*) Crystal contact between h33a of one subunit and ribosomal protein S11 of an adjacent subunit in crystal form 1. (*C*) Packing interactions between neighboring subunits in crystal form 1. Helix 44 and ribosomal proteins are colored either green or blue in different subunits. (*D*) Packing between neighboring subunits in crystal form 2, including new contacts between ribosomal proteins. Colors are as in panel (*D*). (*E*) Packing arrangement of wt 30S subunits in crystal form 1 and (*F*) P90W SmD 30S subunits in crystal form 2.


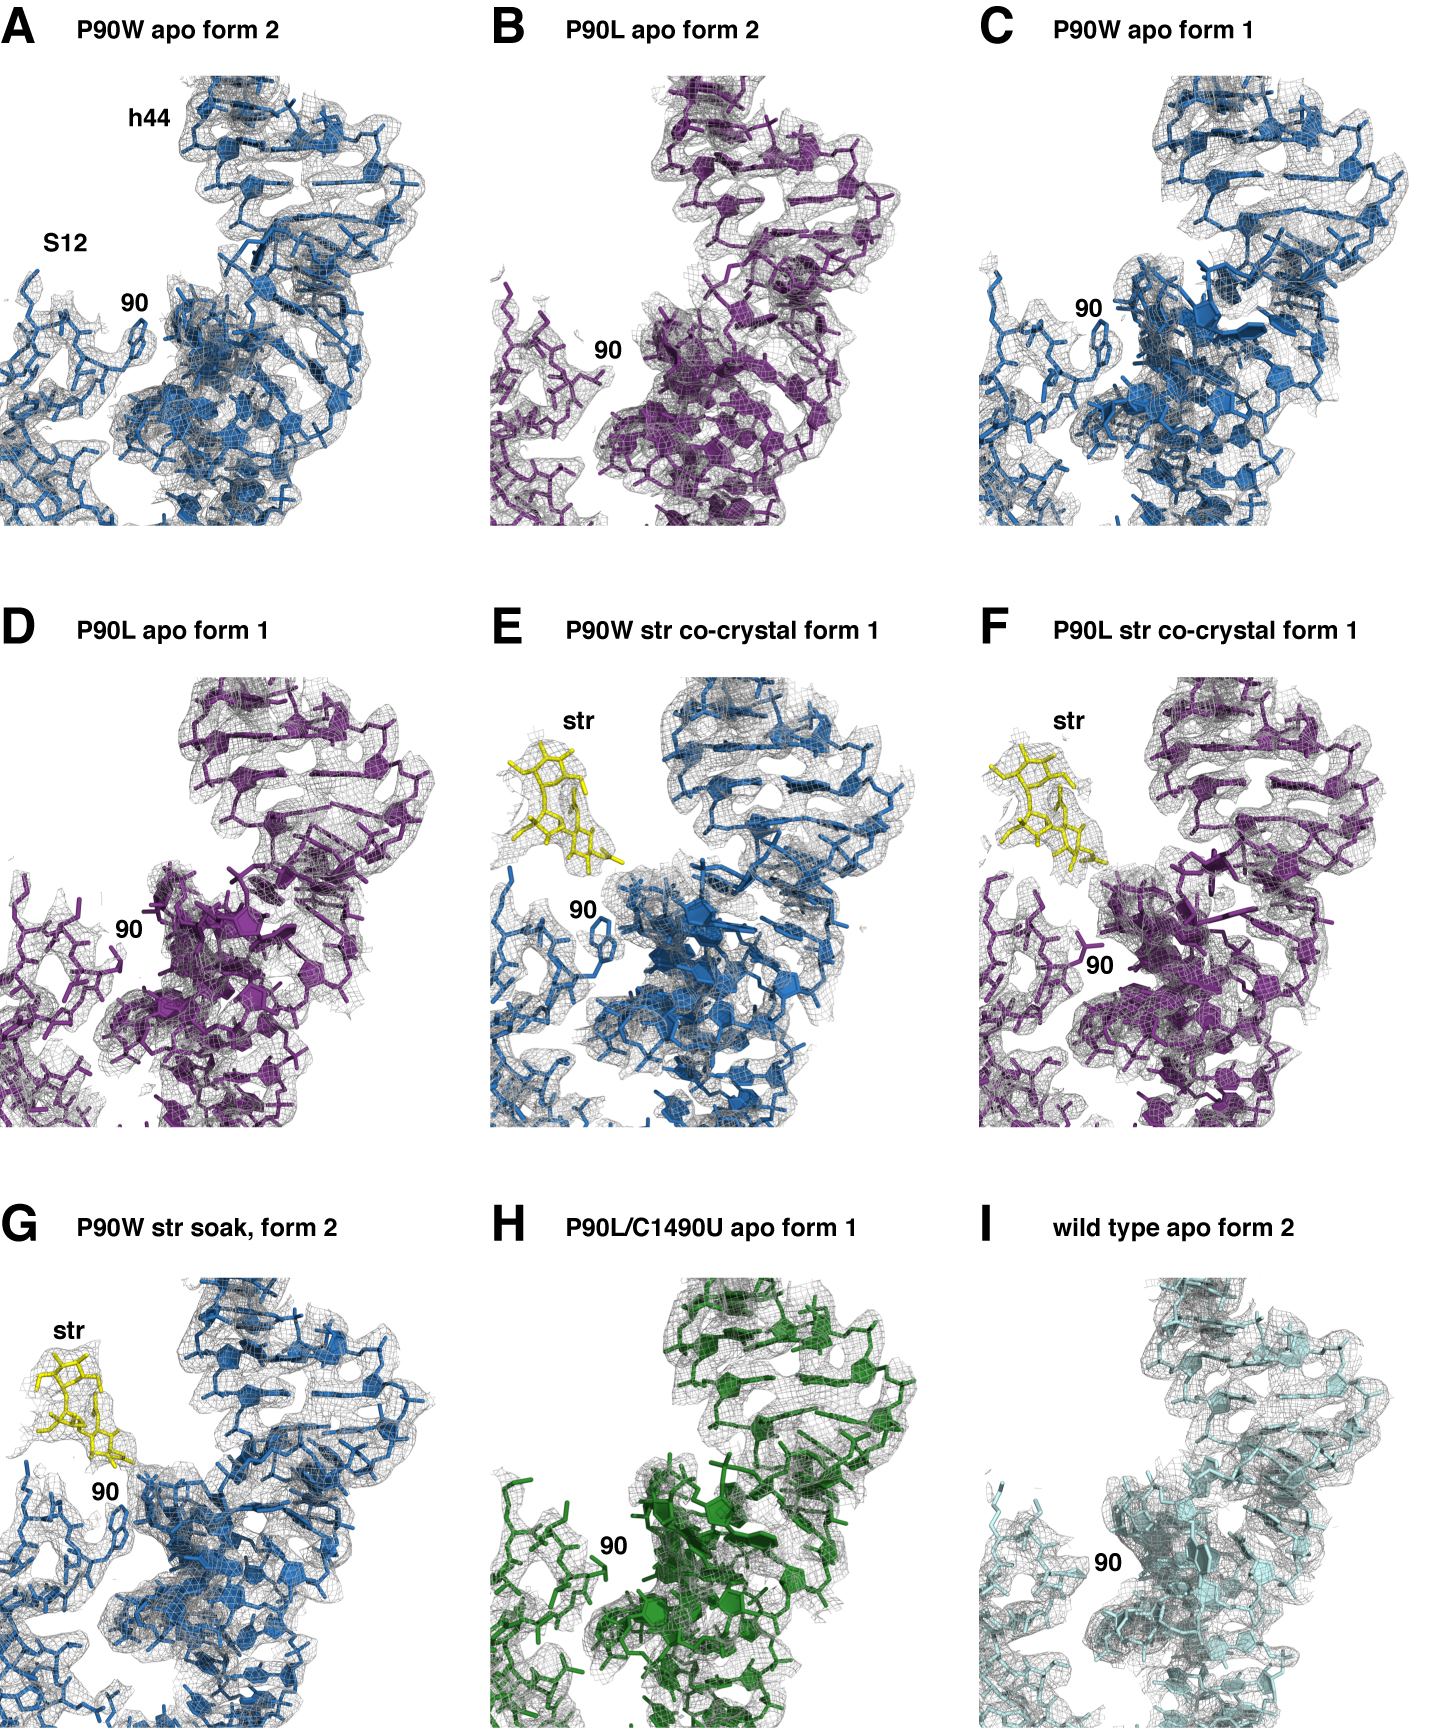


**FIGURE S2. Composite omit density maps at 1σ of 16S rRNA helix 44 in wild-type and mutant crystal structures.** (*A*) P90W apo, crystal form 2; (*B*) P90L apo, crystal form 2; (*C*) P90W crystal form 1; (*D*) P90L crystal form 1; (*E*) P90W streptomycin co-crystal, form1; (*F*) P90L streptomycin co-crystal, form 1; (*G*) P90W streptomycin soak, crystal form 2; (*H*) P90L/C1490U apo, crystal form 1; (*I*) wild-type apo, crystal form 2. Streptomycin is shown as yellow sticks.

**Table S1.** Data collection and refinement statistics.

|  | P90L Apo | P90L Str Cocrystal | P90W Apo | P90W Str  Cocrystal |
| --- | --- | --- | --- | --- |
| PDB ID | 4JI0 | 4JI1 | 4JI2 | 4JI3 |
|  | Crystal form 1 | Crystal form 1 | Crystal form 1 | Crystal form 1 |
| **Data collection1** |  |  |  |  |
| Beamline | APS (ID-24-C) | APS (ID-24-C) | APS (ID-24-C) | APS (ID-24-C) |
| Space group | P41212 | P41212 | P41212 | P41212 |
| Cell dimensions |  |  |  |  |
| *a*, *b*, *c* (Å) | 403.7, 403.7, 174.3 | 403.2, 403.2, 173.3 | 402.4, 402.4, 174.4 | 403.0, 403.0, 173.1 |
| α, β, γ (°) | 90, 90, 90 | 90, 90, 90 | 90, 90, 90 | 90, 90, 90 |
| Resolution (Å)2 | 50.0-3.50  (3.69-3.50) | 35.0-3.15  (3.25-3.15) | 50-3.65  (3.85-3.65) | 35.0-3.35  (3.47-3.35) |
| *R*merge | 0.159 (0.949) | 0.069 (0.627) | 0.183 (0.903) | 0.072 (0.624) |
| *I* / σ*I* | 11.70 (1.71) | 16.65 (1.96) | 10.15 (1.84) | 14.66 (1.94) |
| Completeness (%) | 99.1 (96.4) | 99.0 (97.7) | 98.9 (95.2) | 88.2 (92.3) |
| Redundancy | 3.7 (3.7) | 3.4 (3.4) | 4.1 (4,2) | 4.4 (4.3) |
|  |  |  |  |  |
| **Refinement** |  |  |  |  |
| Resolution (Å) | 50-3.50  (3.53-3.50) | 35-3.15  (3.18-3.15) | 50-3.65  (3.68-3.65) | 34-3.35  (3.38-3.35) |
| No. reflections | 179494 (4692) | 241726 (6294) | 157539 (3813) | 178313 (5150) |
| *R*work / *R*free | 0.167/0.212  (0.307/0.360) | 0.165/0.207 (0.295/0.329) | 0.155/0.211 (0.283/0.335) | 0.168/0.215 (0.285/0.339) |
| No. atoms |  |  |  |  |
| Protein | 19091 | 19171 | 19095 | 19095 |
| RNA | 32644 | 32507 | 32644 | 32487 |
| Ligand/Ion/Water | 581 | 1098 | 568 | 519 |
| *B*-factors |  |  |  |  |
| Protein | 176.92 | 127.21 | 160.62 | 150.2 |
| RNA | 163.72 | 118.45 | 150.56 | 141.2 |
| Ligand/Ion/Water | 141.83 | 137.36 | 123.90 | 121.8 |
| Coordinate errors | 0.40 | 0.33 | 0.40 | 0.35 |
| R.m.s deviations |  |  |  |  |
| Bond lengths (Å) | 0.006 | 0.007 | 0.013 | 0.006 |
| Bond angles (°) | 1.044 | 1.212 | 1.92 | 1.034 |
| Ramachandran plot |  |  |  |  |
| Favored (%) | 1808 (88.2) | 1830 (88.8) | 1791 (87.2) | 1834 (89.3) |
| Allowed (%) | 218 (10.6) | 197 (9.6) | 235 (11.4) | 195 (9.5) |
| Generously allowed (%) | 23 (1.1) | 27(1.3) | 27 (1.3) | 24 (1.2) |
| Disallowed (%) | 2 (0.1) | 6 (0.3) | 1 (0.0) | 1 (0.0) |

1One crystal was used for each dataset.

2The highest resolution shell is shown in parenthesis.

**Table S1.** Data collection and refinement statistics (cont'd).

|  | P90L/C1490U Apo | Wild-type Apo | P90L Apo | P90W Apo | P90W Str  Soak |
| --- | --- | --- | --- | --- | --- |
| PDB ID | 4JI4 | 4JI5 | 4JI6 | 4JI7 | 4JI8 |
|  | Crystal form1 | Crystal form 2 | Crystal form 2 | Crystal form 2 | Crystal form2 |
| **Data collection1** |  |  |  |  |  |
| Beamline | APS (ID-24-C) | NSLS (X25) | APS (ID-24-C) | SLS (X06SA) | SLS (X06SA) |
| Space group | P41212 | P41212 | P41212 | P41212 | P41212 |
| Cell dimensions |  |  |  |  |  |
| *a*, *b*, *c* (Å) | 401.9, 401.9, 174.6 | 399.6, 399.6, 215.9 | 401.6, 401.6, 217.1 | 398.5, 398.5, 214.8 | 400.7, 400.7, 214.8 |
| α, β, γ (°) | 90, 90, 90 | 90, 90, 90 | 90, 90, 90 | 90, 90, 90 | 90, 90, 90 |
| Resolution (Å)2 | 50.0-3.70  (3.90-3.70) | 50-3.85  (3.94-3.85) | 50.0-3.55  (3.75-3.55) | 50.0-3.5  (3.70-3.50) | 50.0-3.75  (3.96-3.75) |
| *R*merge | 0.157(0.921) | 0.142 (0.976) | 0.151 (0.776) | 0.144 (0.821) | 0.122 (0.810) |
| *I* / σ*I* | 13.21 (1.79) | 11.37 (1.90) | 9.77 (1.77) | 11.36 (2.01) | 18.11 (1.87) |
| Completeness (%) | 98.4 (96.5) | 99.3 (99.9) | 98.3 (96.9) | 99.6 (97.6) | 99.7 (98.3) |
| Redundancy | 4.9 (4.9) | 9.0 (9.2) | 6.1 (6.2) | 7.6 (7.2) | 18.1 (18.4) |
| **Refinement** |  |  |  |  |  |
| Resolution (Å) | 50-3.70  (3.69-3.65) | 50-3.85  (3.89-3.85) | 50-3.55  (3.59-3.55) | 50-3.50  (3.54-3.50) | 50-3.75  (3.78-3.75) |
| No. reflections | 150242 (3979) | 162952 (5050) | 209597 (5955) | 214519 (6208) | 177681 (5103) |
| *R*work / *R*free | 0.156/0.214 (0.289/0.326) | 0.153/0.202 (0.259/0.338) | 0.151/0.201 (0.282/0.339) | 0.158/0.201 (0.297/0.355) | 0.137/0.187  (0.267/0.316) |
| No. atoms |  |  |  |  |  |
| Protein | 19091 | 19090 | 19091 | 19095 | 19095 |
| RNA | 32644 | 32687 | 32687 | 32687 | 32550 |
| Ligand/Ion/Water | 546 | 451 | 1666 | 2028 | 1918 |
| *B*-factors |  |  |  |  |  |
| Protein | 193.2 | 166.9 | 147.0 | 119.6 | 158.2 |
| RNA | 178.4 | 160.8 | 138.7 | 112.9 | 150.4 |
| Ligand/Ion/Water | 150.8 | 152.7 | 178.5 | 153.0 | 189.6 |
| Coordinate errors | 0.42 | 0.38 | 0.39 | 0.37 | 0.40 |
| R.m.s deviations |  |  |  |  |  |
| Bond lengths (Å) | 0.012 | 0.013 | 0.020 | 0.009 | 0.022 |
| Bond angles (°) | 1.78 | 1.97 | 2.78 | 1.44 | 2.95 |
| Ramachandran plot |  |  |  |  |  |
| Favored (%) | 1800 (87.8) | 1781 (86.9) | 1759 (85.8) | 1827 (88.9) | 1756 (85.5) |
| Allowed (%) | 224 (10.9) | 242 (11.8) | 261 (12.7) | 201 (9.8) | 266 (13.0) |
| Generously allowed (%) | 26 (1.3) | 26 (1.3) | 28 (1.4) | 22 (1.1) | 29 (1.4) |
| Disallowed (%) | 1 (0.0) | 1 (0.0) | 3 (0.1) | 4 (0.2) | 3 (0.1) |

1One crystal was used for each dataset.

2The highest resolution shell is shown in parenthesis.
